# Supplementary material
Source: PubMed Central journal article supplement (PMC3880903)
Supplement: Supp_Fig1.pdf [file Supp_Fig1.pdf]

## Supplementary Data

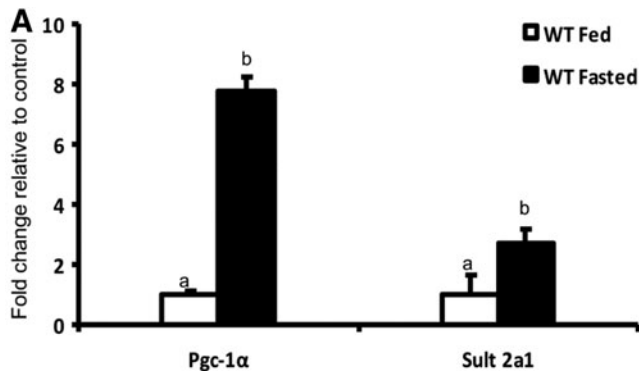

**SUPPLEMENTARY FIG. S1. Induction of PPAR-gamma coactivator 1-alpha (Pgc-1 $\alpha$ ), and sulfotransferase 2a1 (Sult2a1) mRNA expression upon activation of fasting pathway.** Adult C57BL/6 ( $n=8$ /group) mice were fed *ad libitum* or fasted for 24 h. **(A)** 24 fasting increases Pgc-1 $\alpha$  and Sult2a1 mRNA expression-Total RNA was isolated from livers and gene expression of Pgc-1 $\alpha$  and Sult2a1 was quantified by real time quantitative PCR. The data are represented as average  $\pm$  SEM ( $n=8$ ) fold change over the fed controls. All data have been normalized to 18S rRNA.  $p < 0.05$  was considered statistically significant. Groups without a common letter are significantly different.
