# Supplementary material
Source: PubMed Central journal article supplement (PMC3880903)
Supplement: Supp_Fig3.pdf [file Supp_Fig3.pdf]

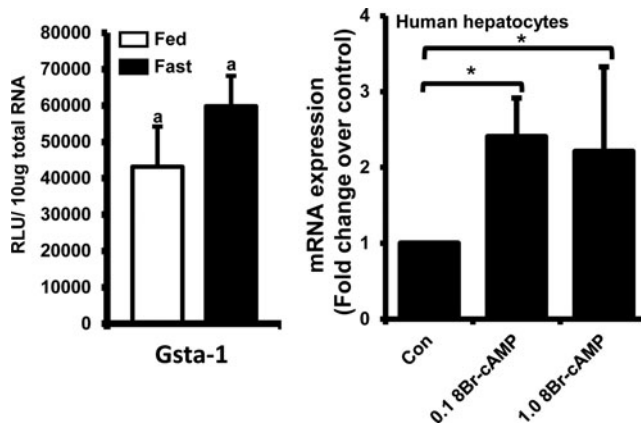

**SUPPLEMENTARY FIG. S3.** Effect of fasting and 3'-5'-cyclic adenosine monophosphate (cAMP)/protein kinase A pathways on GSTA-1 expression in mouse livers and human hepatocytes-(*Left Panel*) Total RNA was isolated from livers of fed and fasted C57BL/6 mice and gene expression of Gsta-1 was quantified by the Branched DNA Signal Amplification Assay. The data are represented as average Relative Light Units (RLU) per 10  $\mu$ g total RNA  $\pm$  SEM ( $n=6$ ). Groups with common letter are not significantly different. Fasting did not significantly increase Gsta-1, but there was an increasing trend ( $p<0.09$ ). (*Right Panel*) Primary human hepatocytes ( $n=3$  donors) were treated with 8-Bromoadenosine-cAMP (8-Br-cAMP) for 24 h, washed with phosphate-buffered saline, and then lysed with passive lysis buffer. GSTA-1 mRNA expression was quantified using Branched DNA Signal Amplification assay (25  $\mu$ l lysate as input) and normalized to B-actin mRNA expression. \*Represents a significant difference ( $p<0.05$ ) by a one-way ANOVA followed by a Duncan's Multiple Range *post hoc* test.
