# Supplementary material
Source: PubMed Central journal article supplement (PMC3880903)
Supplement: Supp_Fig4.pdf [file Supp_Fig4.pdf]

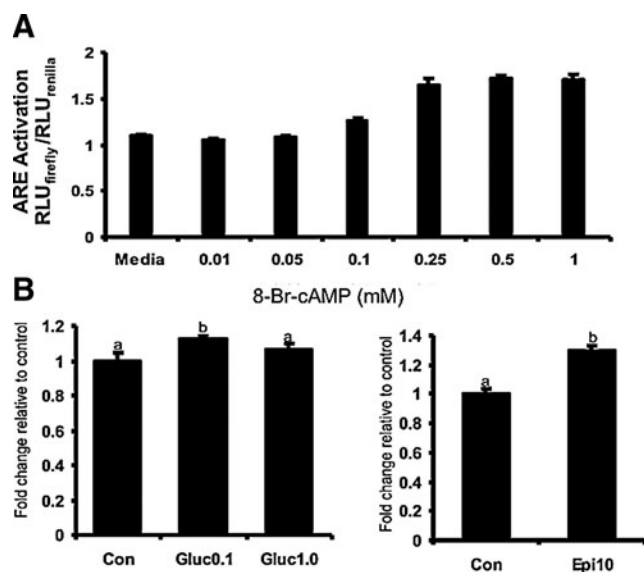

**SUPPLEMENTARY FIG. S4. Activation of antioxidant response element (ARE) in Huh-7 cells by (A) 8-Br-cAMP, and (B) glucagon and epinephrine.** Huh-7 cells were cultured to 85% confluence and transiently transfected with an antioxidant response element–luciferase construct (100 ng) and the empty vector (100 ng) along with a renilla control construct (10 ng) for 24 h. The cells were then treated with 0.01–2.0 mM 8-Br-cAMP, 0.1 or 1.0  $\mu$ M glucagon or 10  $\mu$ M epinephrine for 24 h. The luciferase activity was measured by dual luciferase assay with renilla luciferase as a control. The data are expressed as average fold induction in activity of the ARE-luciferase construct  $\pm$  SEM ( $n=4$ ).
