# Supplementary material
Source: PubMed Central journal article supplement (PMC3880903)
Supplement: Supp_Fig5.pdf [file Supp_Fig5.pdf]

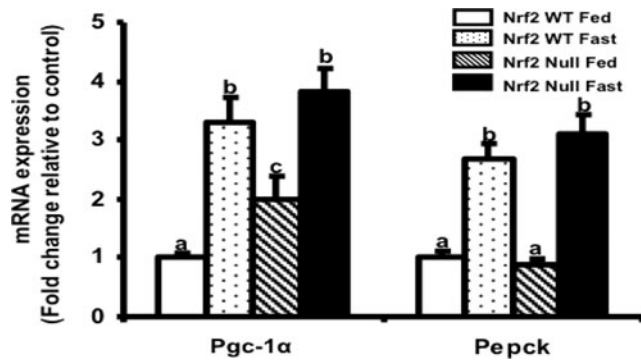

**SUPPLEMENTARY FIG. S5.** Fasting for 24 h increased Pgc-1 $\alpha$  and phosphoenolpyruvate carboxykinase (Pepck) expression in both Nrf2 WT and Nrf2 null mice. Liver total RNA was prepared from Nrf2 WT and null mice either fed *ad libitum* or fasted for 24 h using and mRNA expression of Pgc-1 alpha and Pepck was quantified by RT<sup>2</sup>-PCR. The data are represented as average  $\pm$  SEM ( $n=6$ ) fold change over the fed controls. All data have been normalized to 18S rRNA. Groups without a common letter are significantly different ( $p < 0.05$ ).
