# Supplementary material
Source: PubMed Central journal article supplement (PMC3880903)
Supplement: Supp_Fig6.pdf [file Supp_Fig6.pdf]

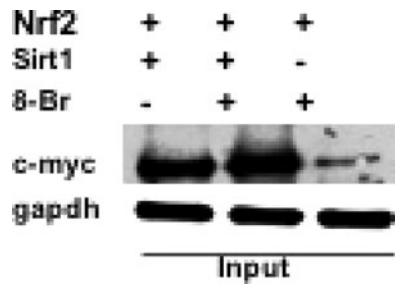

**SUPPLEMENTARY FIG. S6. 8-Br-cAMP induces expression of SIRT1 in Huh-7 cells.** Huh-7 cells transiently transfected with (0.5–1.0  $\mu$ g) Flag-Pgc-1 $\alpha$ , 75 ng Flag-NRF2 and 50 ng Myc-SIRT1 expression plasmids or (50–100 ng) Myc-SIRT1, 75 ng Flag-NRF2 and 0.5  $\mu$ g Flag-Pgc-1 $\alpha$  expression plasmids using Lipofectamine LTX-plus reagent (Invitrogen) for 24 h. Cells were then treated with 1.0 mM 8-Br-cAMP for 24 h. After 24 h, cells were lysed with lysis buffer (50 mM Tris-HCl pH 7.5, 150 mM NaCl, 0.05% NP-40). 25  $\mu$ g protein lysate was then subjected to immunoblot analysis for anti-cMyc tag protein.
