# Supplementary material
Source: PubMed Central journal article supplement (PMC3880903)
Supplement: Supp_Fig7.pdf [file Supp_Fig7.pdf]

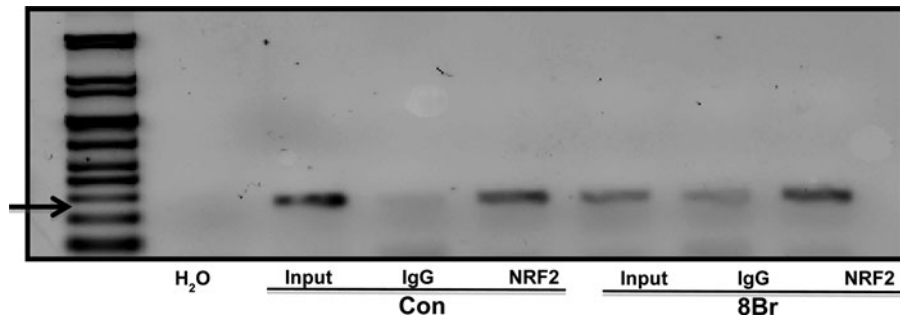

**SUPPLEMENTARY FIG. S7. 8-Br-cAMP does not increase NRF2 recruitment at NFE2-p45 like ARE element in the 5'-flanking region of ABCC2.** Huh-7 cells were treated with 8-Br-cAMP (0.1 mM) for 45 min and were washed and cross-linked for 10 min with 1% formaldehyde and crosslinking terminated by 125 mM glycine. The chromatin were sheared and prepared and incubated overnight with Protein G magnetic beads with Anti-NRF2 antibody or preimmune IgG. The antibody-bound chromatin and input DNA (1/10 dilution) were analyzed by PCR for the presence of DNA- fragments containing NRF2 bound-ARE-like element (NFE2-p45 like) with primers directed toward that region of the ABCC2 promoter.
